# Supplementary material for: High-sensitivity cardiac troponin I and risk of heart failure in patients with suspected acute coronary syndrome: a cohort study
Source: PubMed Central journal article supplement (PMC5805120; doi:10.1093/ehjqcco/qcx022), 2017-07-19
Supplement: data_supplement_qcx022.pdf [file data_supplement_qcx022.pdf]

**High-sensitivity Cardiac Troponin I and Risk of Heart Failure  
in Patients with Suspected Acute Coronary Syndrome:  
A Cohort Study**

D Stelzle MD MPH<sup>1</sup>, ASV Shah MBChB PhD<sup>1</sup>, A Anand MBChB<sup>1</sup>, FE Strachan PhD<sup>1</sup>,  
AR Chapman MB ChB<sup>1</sup>, MA Denvir MBChB PhD<sup>1</sup>,  
NL Mills MBChB PhD<sup>1</sup>, DA McAllister MD<sup>2,3</sup>

<sup>1</sup> *BHF Centre for Cardiovascular Science, University of Edinburgh, United Kingdom*

<sup>2</sup> *The Institute of Health and Wellbeing, University of Glasgow, United Kingdom*

<sup>3</sup> *The Usher Institute of Population Health and Informatics, University of Edinburgh, United Kingdom*

**Correspondence and requests for reprints:**

Dominik Stelzle  
BHF Centre for Cardiovascular Science, University of Edinburgh  
Edinburgh, EH16 4SB  
United Kingdom  
Tel: +49 177 1695329  
Email: dominik.stelzle@tum.de

**Tables and Figures:** 5

**Support:** British Heart Foundation Special Project Grant  
(SP/12/10/29922), Project Grant (PG/15/51/31596) and Senior  
Fellowship (FS/16/14/32023)

**Table 1** Association of maximal and presentation troponin and the outcomes stratified by admission diagnosis\*

|                                                     | Troponin<br>≤99 centile<br>URL | Troponin >99 <sup>th</sup> centile URL |                     |                     |                      |
|-----------------------------------------------------|--------------------------------|----------------------------------------|---------------------|---------------------|----------------------|
|                                                     |                                | Overall                                | Type 1 MI           | Type 2 MI           | Myocardial<br>Injury |
| <i>Maximal troponin:</i>                            |                                |                                        |                     |                     |                      |
| Heart failure<br>hospitalisation                    | 2.80<br>(1.81-4.31)            | 1.03<br>(0.96-1.12)                    | 1.06<br>(0.96-1.17) | 0.81<br>(0.57-1.14) | 1.21<br>(1.00-1.47)  |
| Heart failure hospitali-<br>sation or cardiac death | 3.03<br>(2.05-4.47)            | 1.03<br>(0.97-1.10)                    | 1.04<br>(0.96-1.13) | 1.00<br>(0.81-1.24) | 1.14<br>(0.96-1.35)  |
| <i>Presentation troponin:</i>                       |                                |                                        |                     |                     |                      |
| Heart failure<br>hospitalisation                    | 2.66<br>(1.76-4.03)            | 1.07<br>(0.97-1.18)                    | 1.06<br>(0.94-1.20) | 0.99<br>(0.69-1.36) | 1.25<br>(0.98-1.60)  |
| Heart failure hospitali-<br>sation or cardiac death | 2.84<br>(1.97-4.11)            | 1.05<br>(0.96-1.14)                    | 1.05<br>(0.95-1.16) | 1.03<br>(0.81-1.31) | 1.12<br>(0.89-1.41)  |

\* HRs (95%CI), adjusted for age and sex

**Figure 1** Association between troponin and time to first event for heart failure hospitalisation and heart failure hospitalisation of cardiac death stratified by gender

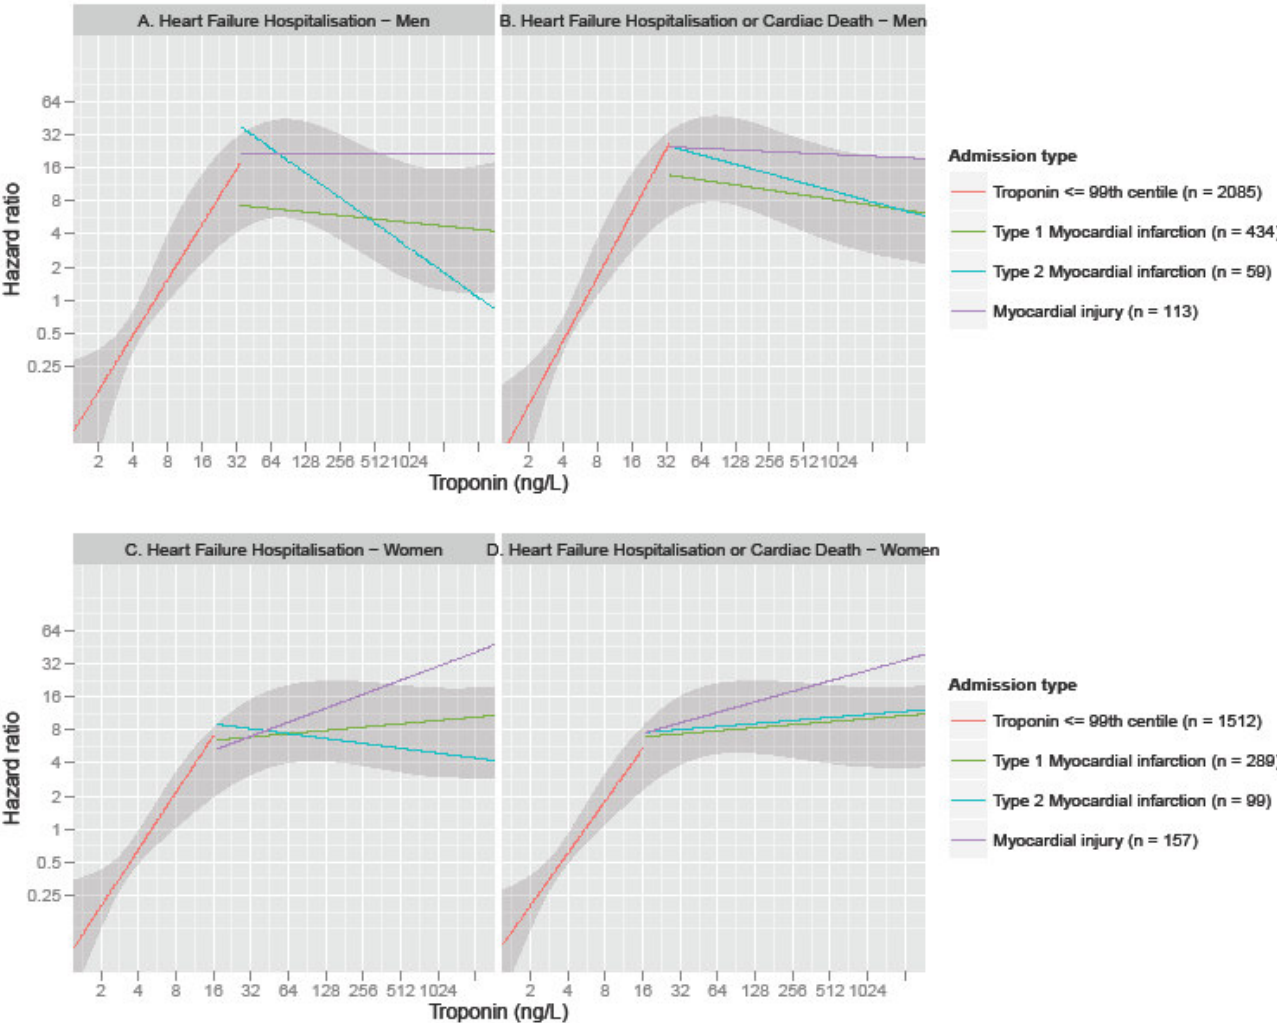

**Table 2** Association between troponin and heart failure hospitalisation (or cardiac death) – A comparison of analyses with the complete cohort and sensitivity analyses excluding patients with heart failure at the index presentation

|                                                       | Complete cohort  |                  | Sensitivity analyses |                  |
|-------------------------------------------------------|------------------|------------------|----------------------|------------------|
|                                                       | Troponin         | Troponin squared | Troponin             | Troponin squared |
| <i>Heart failure hospitalisation</i>                  |                  |                  |                      |                  |
| HRs, unadjusted                                       | 2.29 (1.82-2.88) | 0.96 (0.94-0.97) | 2.18 (1.65-2.87)     | 0.96 (0.95-0.98) |
| HRs, model 1                                          | 1.92 (1.50-2.45) | 0.97 (0.95-0.98) | 1.87 (1.39-2.52)     | 0.97 (0.95-0.99) |
| HRs, model 2                                          | 1.84 (1.39-2.43) | 0.97 (0.95-0.99) | 1.71 (1.23-2.37)     | 0.98 (0.96-1.00) |
| <i>Heart failure hospitalisation or cardiac death</i> |                  |                  |                      |                  |
| HRs, unadjusted                                       | 2.45 (2.01-2.98) | 0.95 (0.94-0.97) | 2.39 (1.88-3.03)     | 0.96 (0.94-0.97) |
| HRs, model 1                                          | 1.99 (1.61-2.46) | 0.97 (0.96-0.98) | 1.99 (1.54-2.57)     | 0.97 (0.95-0.98) |
| HRs, model 2                                          | 1.92 (1.51-2.45) | 0.97 (0.96-0.98) | 1.94 (1.45-2.59)     | 0.97 (0.95-0.99) |

Hazard Ratio (95%CI). Model 1 adjusts for age and sex; model 2 additionally adjusts for diabetes mellitus, hypertension, ischaemic heart disease and creatinine concentration at the index admission.

**Table 3** Association between troponin and heart failure hospitalisation (or cardiac death) stratified by gender

|                                                                                                  | Men (n=2691)     |                  | Women (n=2057)   |                  |
|--------------------------------------------------------------------------------------------------|------------------|------------------|------------------|------------------|
|                                                                                                  | Troponin         | Troponin squared | Troponin         | Troponin squared |
| <i>Heart failure hospitalisation (n=36 events in men, n=47 events in women)</i>                  |                  |                  |                  |                  |
| HRs, unadjusted                                                                                  | 3.03 (1.97-4.66) | 0.94 (0.91-0.96) | 2.05 (1.55-2.72) | 0.97 (0.95-0.99) |
| HRs, model 1                                                                                     | 2.48 (1.57-3.91) | 0.95 (0.92-0.98) | 1.75 (1.29-2.37) | 0.98 (0.96-1.00) |
| HRs, model 2                                                                                     | 2.41 (1.51-3.85) | 0.95 (0.92-0.98) | 1.66 (1.20-2.28) | 0.98 (0.96-1.00) |
| <i>Heart failure hospitalisation or cardiac death (n=57 events in men, n=63 events in women)</i> |                  |                  |                  |                  |
| HRs, unadjusted                                                                                  | 3.48 (2.41-5.03) | 0.93 (0.90-0.95) | 2.07 (1.62-2.65) | 0.97 (0.95-0.98) |
| HRs, model 1                                                                                     | 2.73 (1.84-4.05) | 0.94 (0.92-0.97) | 1.76 (1.35-2.29) | 0.98 (0.96-0.99) |
| HRs, model 2                                                                                     | 2.66 (1.78-3.97) | 0.95 (0.92-0.97) | 1.69 (1.27-2.25) | 0.98 (0.96-1.00) |

Hazard Ratio (95%CI). Model 1 adjusts for age; model 2 additionally adjusts for diabetes mellitus, hypertension, ischaemic heart disease and creatinine concentration at the index admission.

**Table 4** Association of maximal troponin and the outcomes stratified by admission diagnosis having excluded patients with heart failure\*

| Sensitivity analysis                                | Troponin<br>≤99 centile<br>URL | Troponin >99 <sup>th</sup> centile URL |                     |                     |                      |
|-----------------------------------------------------|--------------------------------|----------------------------------------|---------------------|---------------------|----------------------|
|                                                     |                                | Overall                                | Type 1 MI           | Type 2 MI           | Myocardial<br>Injury |
| <i>Maximal troponin:</i>                            |                                |                                        |                     |                     |                      |
| Heart failure<br>hospitalisation                    | 2.91<br>(1.79-4.73)            | 1.07<br>(0.97-1.19)                    | 1.08<br>(0.96-1.22) | 0.43<br>(0.09-2.09) | 1.27<br>(1.00-1.61)  |
| Heart failure hospitali-<br>sation or cardiac death | 2.97<br>(1.93-4.58)            | 1.06<br>(0.98-1.15)                    | 1.05<br>(0.95-1.16) | 1.14<br>(0.87-1.49) | 1.15<br>(0.92-1.45)  |

\* Hazard Ratios (95%CI), adjusted for age and sex
